# Supplementary material
Source: publisher figshare collection journal article supplement (https://frontiersin.figshare.com/ndownloader/files/31187373)
Supplement: Supplementary file 1 [file 31187373]

| **Patch Number** | **Area**  **(km2)** | **Cumulative Area** | **Percent of all Buffelgrass** | **Cumulative Percentage of buffelgrass** |
| --- | --- | --- | --- | --- |
| 1 | 0.34 | 0.34 | 7.7% | 7.7% |
| 2 | 0.24 | 0.58 | 5.4% | 13.2% |
| 3 | 0.13 | 0.72 | 3.0% | 16.2% |
| 4 | 0.13 | 0.85 | 2.9% | 19.1% |
| 5 | 0.12 | 0.96 | 2.6% | 21.7% |
| 6 | 0.11 | 1.07 | 2.4% | 24.1% |
| 7 | 0.06 | 1.13 | 1.4% | 25.5% |
| 8 | 0.05 | 1.19 | 1.2% | 26.7% |
| 9 | 0.05 | 1.24 | 1.2% | 27.9% |
| 10 | 0.04 | 1.28 | 1.0% | 28.9% |
| **All Others (6475)** | **3.15** | **4.44** | **78.8%** | **100.0%** |

Table S3. Patch sizes of the 10 largest buffelgrass patches compared to all other patches combined on the south slope of the Santa Catalina Mountains.
